# Supplementary material for: Phase-change-induced martensitic deformation and slip system in GeSbTe
Source: Royal Society of Chemistry journal article supplement (doi:10.1039/c4ra16946h), 2015-01-01
Supplement: c4ra16946h1.pdf [file c4ra16946h1.pdf]

## Supplementary Materials: Phase-change-induced martensitic deformation and slip system in GeSbTe

Moon Hyung Jang<sup>\*†‡</sup>, Kwang Sik Jeong<sup>\*‡</sup>, Seung Jong Park<sup>\*</sup>, Sung Jin Park<sup>\*</sup>, Mann-Ho Cho<sup>\*§</sup>,  
Jae Yong Song<sup>¶</sup>

*\*Institute of Physics and Applied Physics, Yonsei University, Seoul, 120-749, Republic of Korea*

*¶Center for Nanocharacterization, Korea Research Institute of Standards and Science, Daejeon, 305-340,  
Republic of Korea*

---

<sup>†</sup>Current affiliation: Department of Electrical and Computer Engineering, University of Massachusetts,  
Amherst, MA 01003, USA

<sup>§</sup>To whom correspondence should be addressed. E-mail: mh.cho@yonsei.ac.kr

<sup>‡</sup>M.H.J. and K.S.J. contributed equally to this work.

## Supplementary Figure Captions

Figure S1. HRTEM image of an as-grown GST film with no crystallized regions.

Figure S2. (a) HRTEM images of the monoclinic phase, which has an FCC angle of  $90^\circ$ , after annealing at  $220^\circ\text{C}$ . (b) Corresponding FFT diffraction patterns of this crystal, showing  $\gamma$  of  $80.7^\circ$  and monoclinic (200) and (020) lattice spacings of 3.06 and 2.99 Å, respectively. (c) HRTEM image of another monoclinic phase, showing an FCC angle of  $90^\circ$ , after annealing at  $220^\circ\text{C}$ . (d) FFT diffraction patterns obtained from the crystal shown in (c), showing  $\gamma$  of  $81.0^\circ$  and monoclinic (200) and (020) lattice spacings of 3.18 and 3.10 Å, respectively.

Figure S3. (a) HRTEM images of the monoclinic phase, which has an FCC angle of  $90^\circ$ , after annealing at  $220^\circ\text{C}$ . (b) Corresponding FFT diffraction patterns of this crystal, showing  $\gamma$  of  $81.1^\circ$  and monoclinic (200) and (020) lattice spacings of 3.03 and 3.02 Å, respectively. (c) HRTEM image of another monoclinic phase, showing an FCC angle of  $90^\circ$ , after annealing at  $220^\circ\text{C}$ . (d) FFT diffraction patterns from the crystal shown in (c) with a  $\gamma$  angle of  $87.8^\circ$  and monoclinic (200) and (020) lattice spacings of 3.18 and 3.00 Å, respectively.

Figure S4. Volume shrinkage ( $\delta v$ ) of the crystallized region of radius  $R_a$  within an amorphous matrix of radius  $R_b$ . The crystallized region and the amorphous matrix are concentrically spherical in shape.

Figure S5. Images of the geometrically optimized  $4\mathbf{a}\times 4\mathbf{b}\times 4\mathbf{c}$  GST structure with deformation angles ( $\gamma$ ) of (a)  $86^\circ$ , (b)  $78^\circ$ , (c)  $74^\circ$ , and (d)  $66^\circ$ , which have the same configurations as those shown in Figs. 4(c)–(e). The red-dashed boxes correspond to a  $2\mathbf{a}\times 2\mathbf{b}$  cell of the GST structure.

Figure S6. (a) HRTEM images of FCC crystal with slip system in the FCC (111) plane along the  $[\bar{1}10]$  direction. (b) Corresponding Fourier-transformed diffraction patterns, showing FCC[100] and FCC[010] interplanar spacings of 2.99 and 3.07 Å, respectively, and an angle of  $88.6^\circ$  between these planes. (c) Side view of successive atomic motion in the FCC crystal during slip along  $[\bar{1}10]$  in the (111) plane from 1 to 10. The green arrow indicates the direction of the slip.

Figure S7. Total DOS of GST materials for various values of  $\gamma$  ranging from  $90$  to  $66^\circ$ , as obtained by VASP simulation. The vertical dotted line indicates the Fermi level ( $E_F$ ) of the DOS.

The gap below  $E_F$  at  $90^\circ$  indicates the semimetallicity of the FCC crystal structure. After deformation, this gap is filled by electron states except at the angle of  $70^\circ$ .

Figure S1

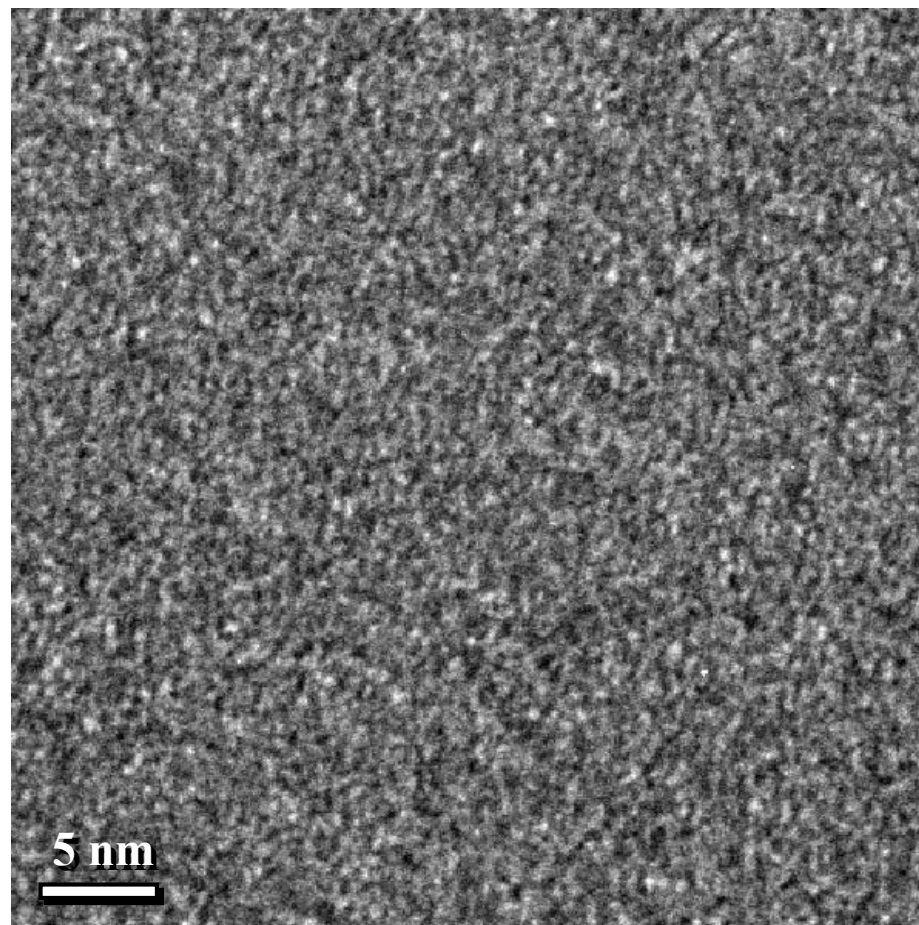

Fig. S1 Jang *et al.*

Figure S2

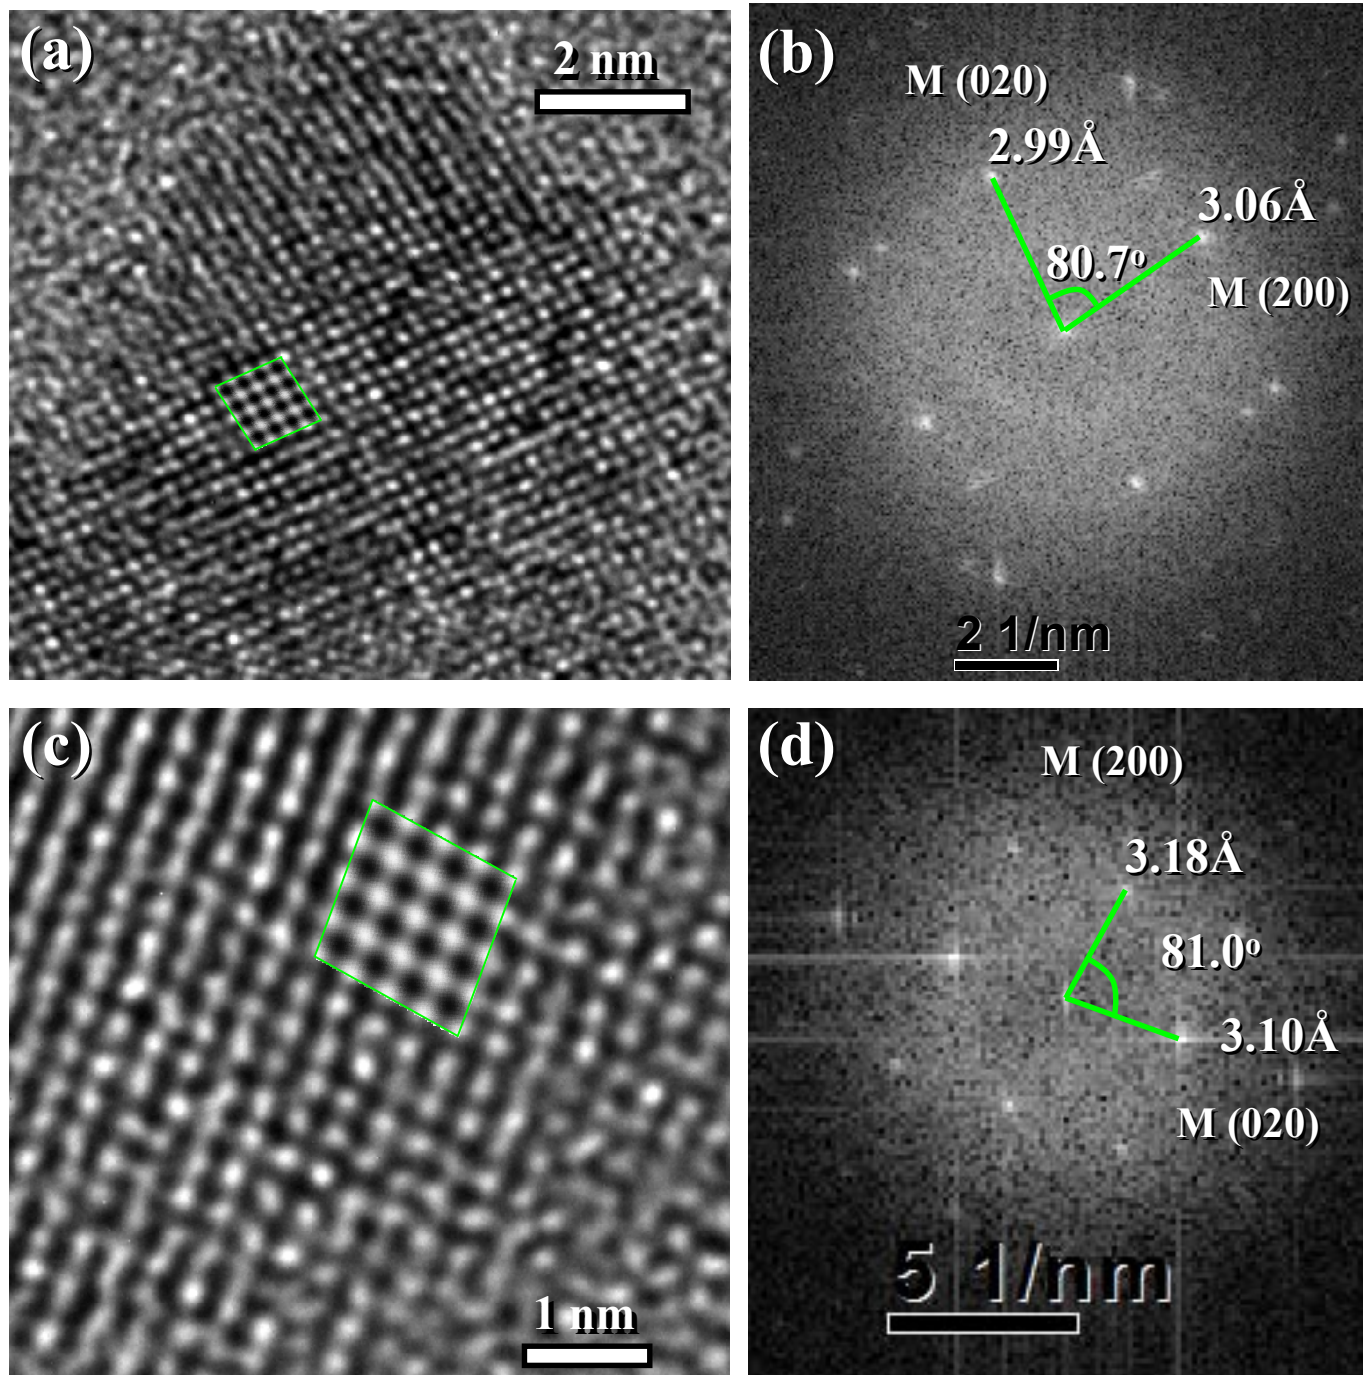

Fig. S2 Jang *et al.*

Figure S3

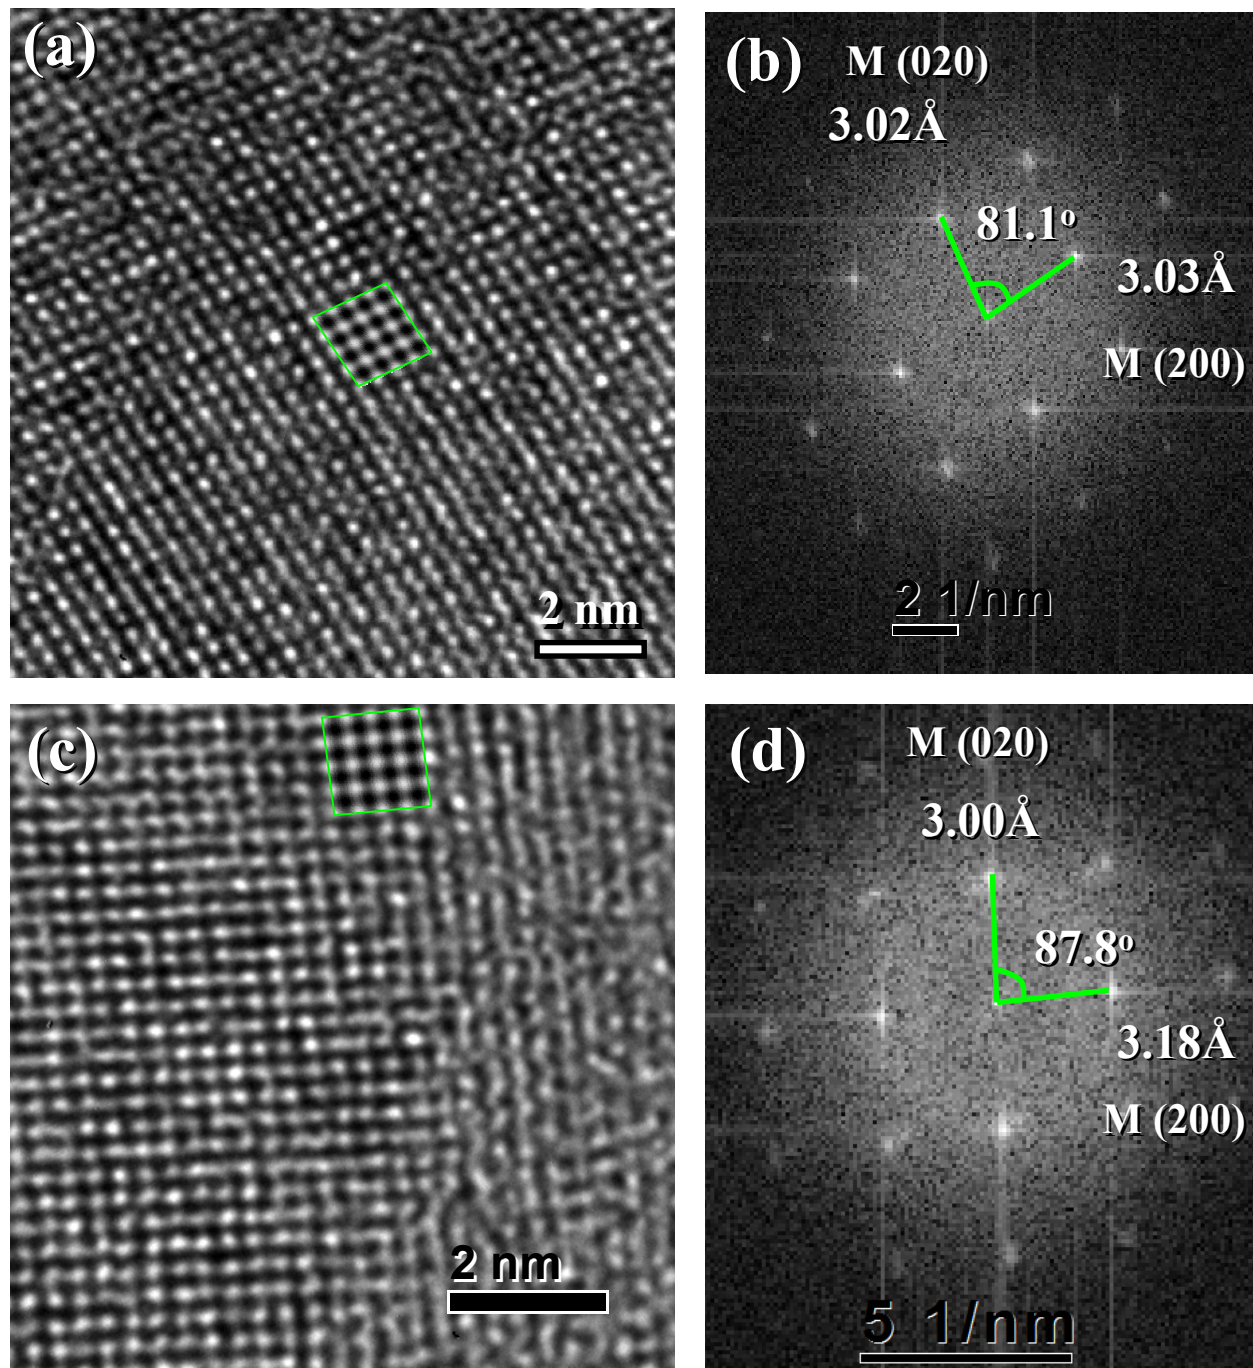

Fig. S3 Jang *et al.*

Figure S4

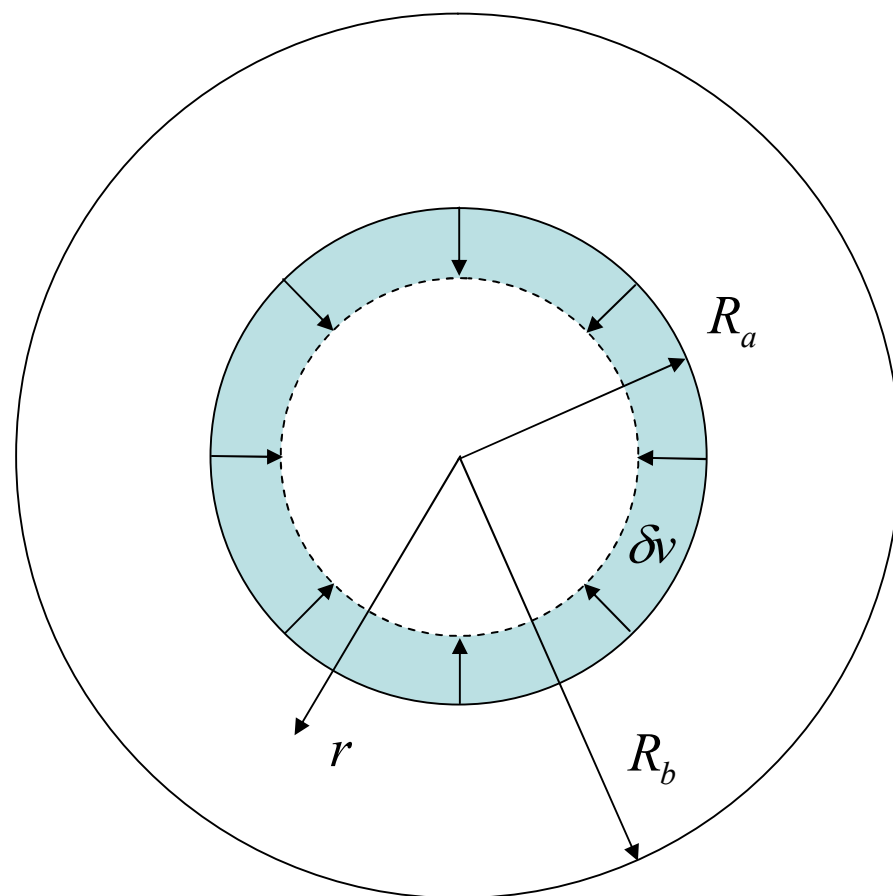

Fig. S4 Jang *et al.*

Figure S5

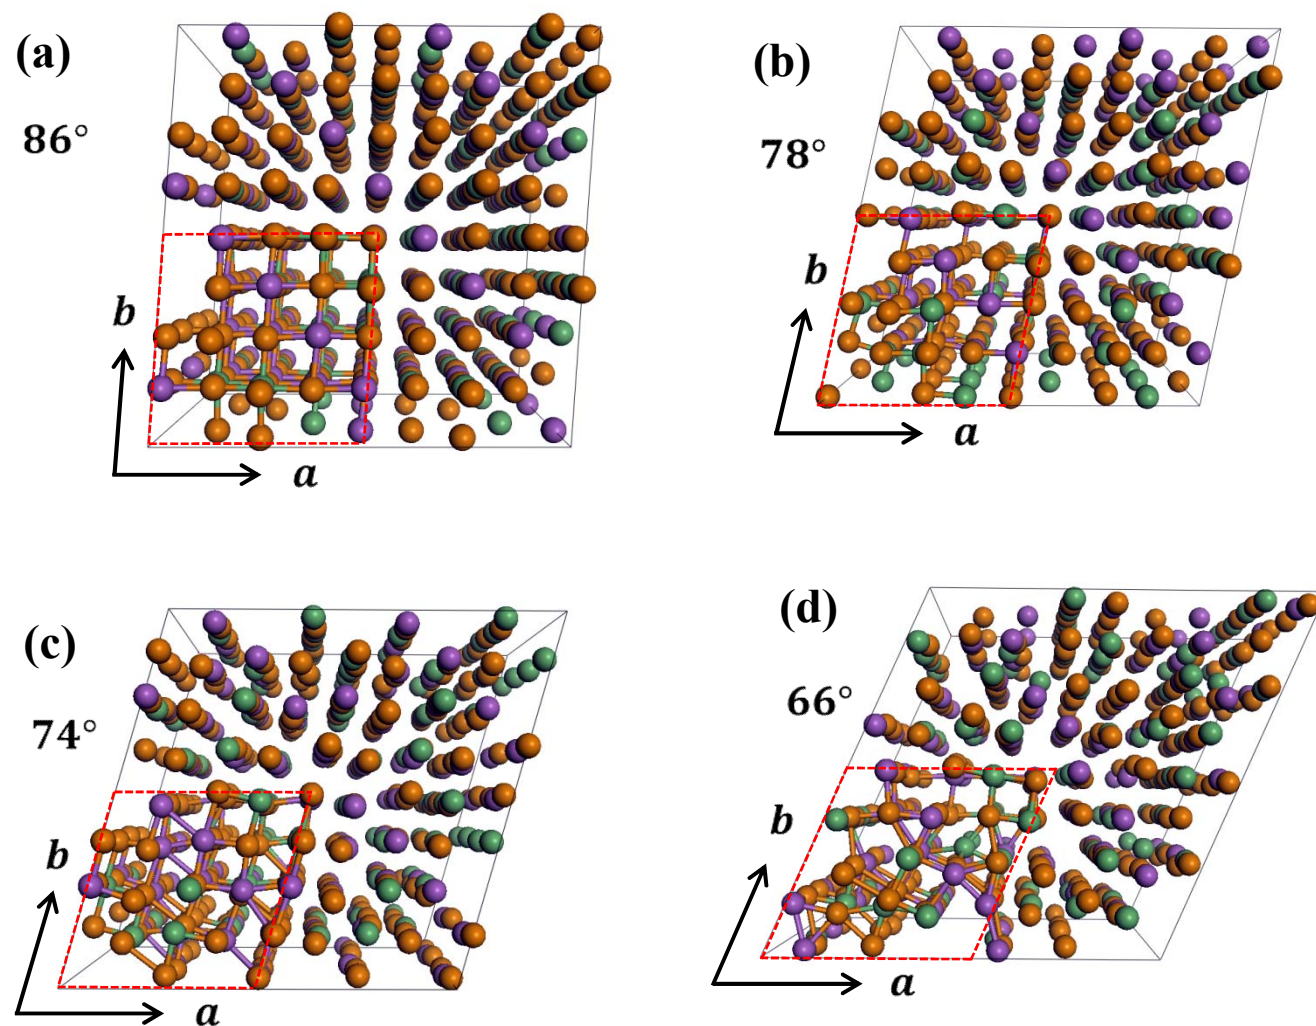

Fig. S5 Jang *et al.*



Figure S6

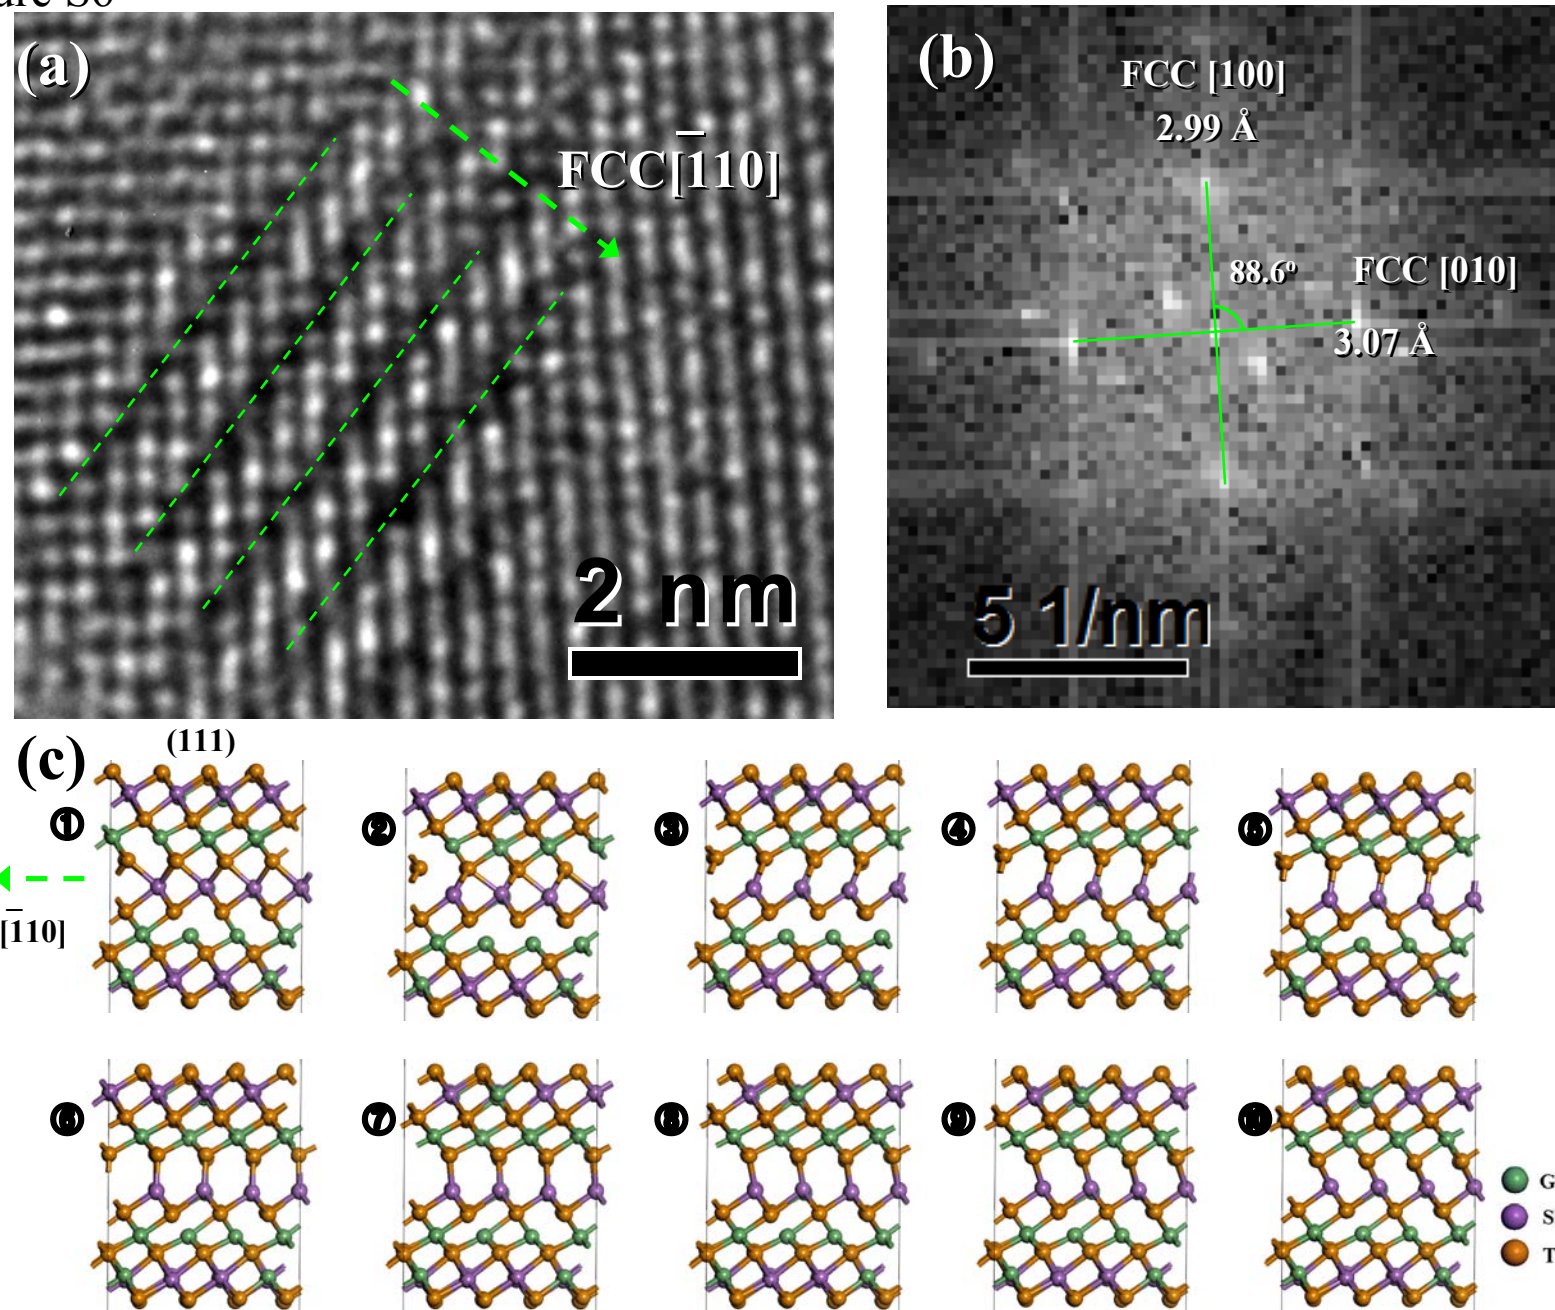

Fig. S6 Jang *et al.*

Figure S7

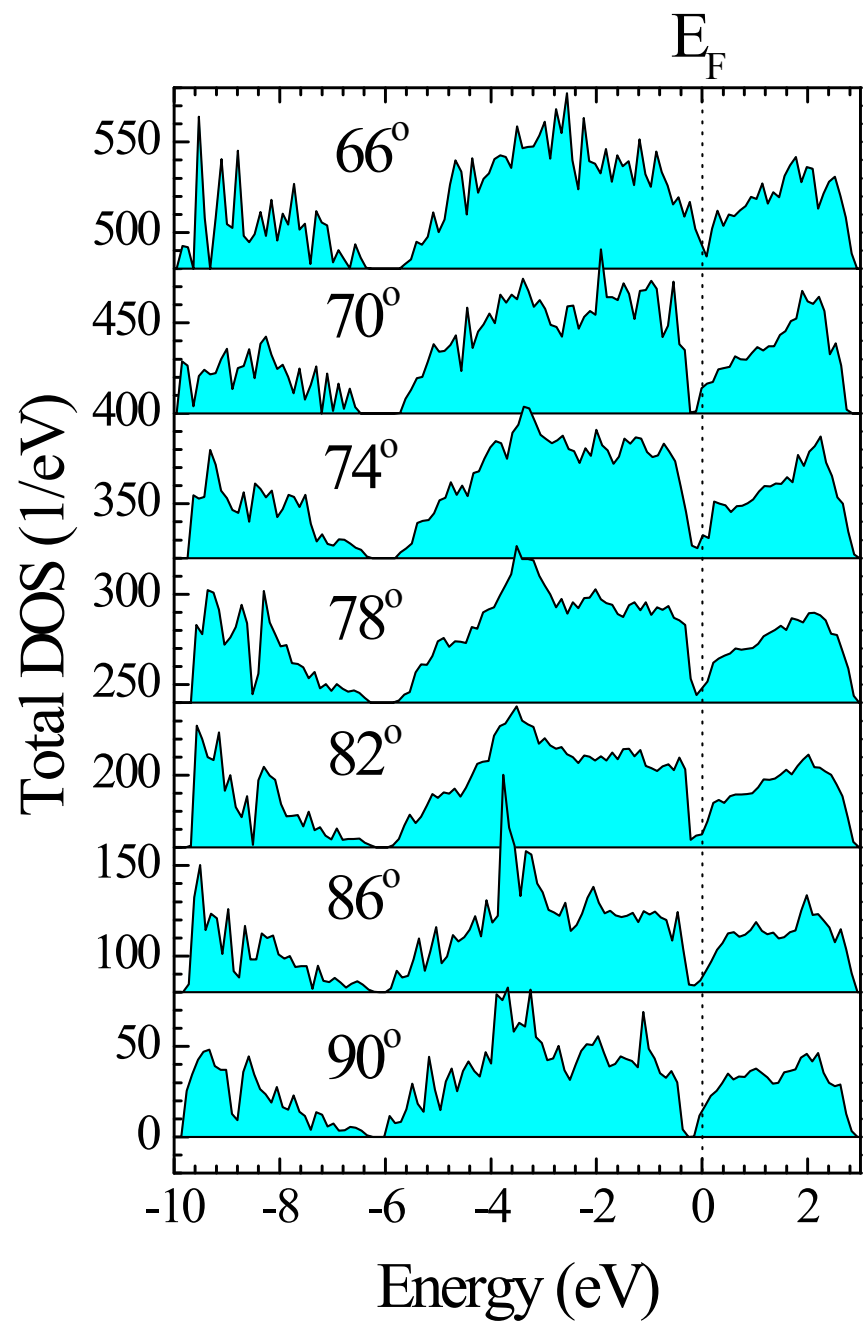

Fig. S7 Jang *et al.*
